# Supplementary material for: Insulin concentration is critical in culturing human neural stem cells and neurons
Source: PubMed Central journal article supplement — Cell Death Dis. 2013 Aug 8;4(8):e766–. doi: 10.1038/cddis.2013.295 (PMC3763456; doi:10.1038/cddis.2013.295), 2013-08-08

# Supplementary Figure S1

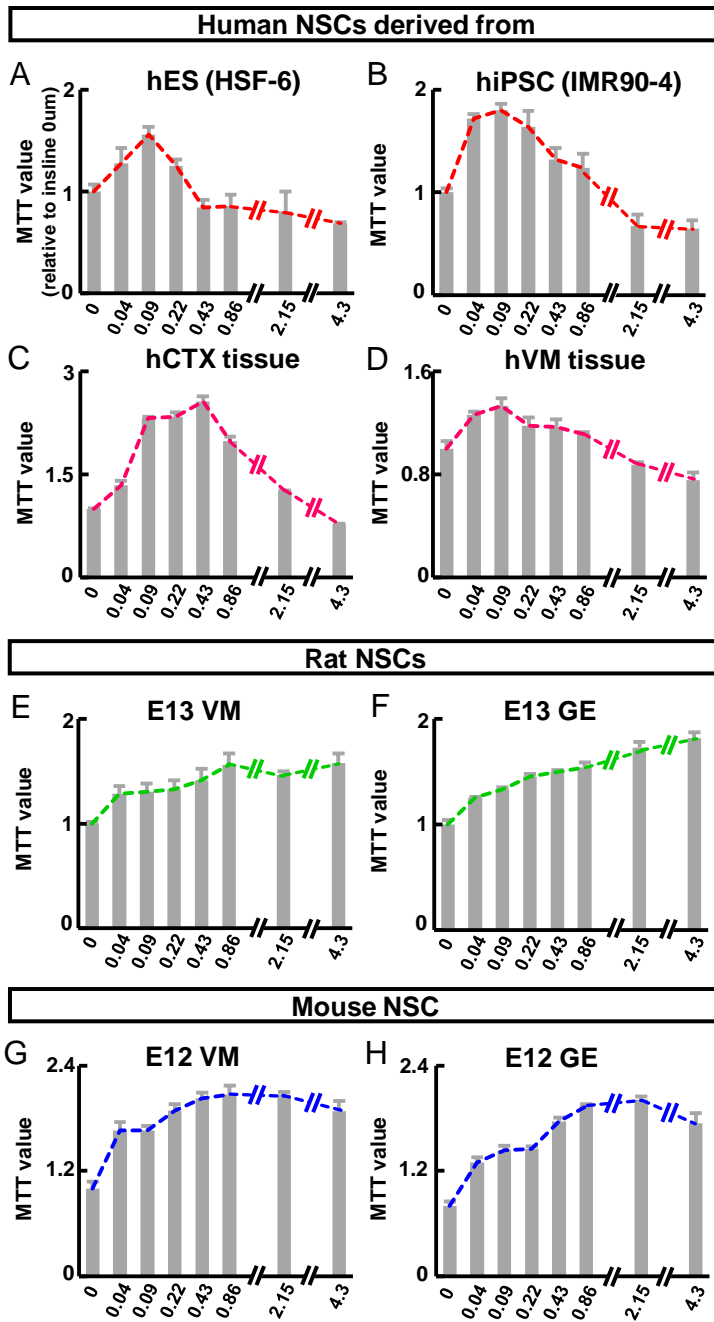

# Supplementary Figure S2

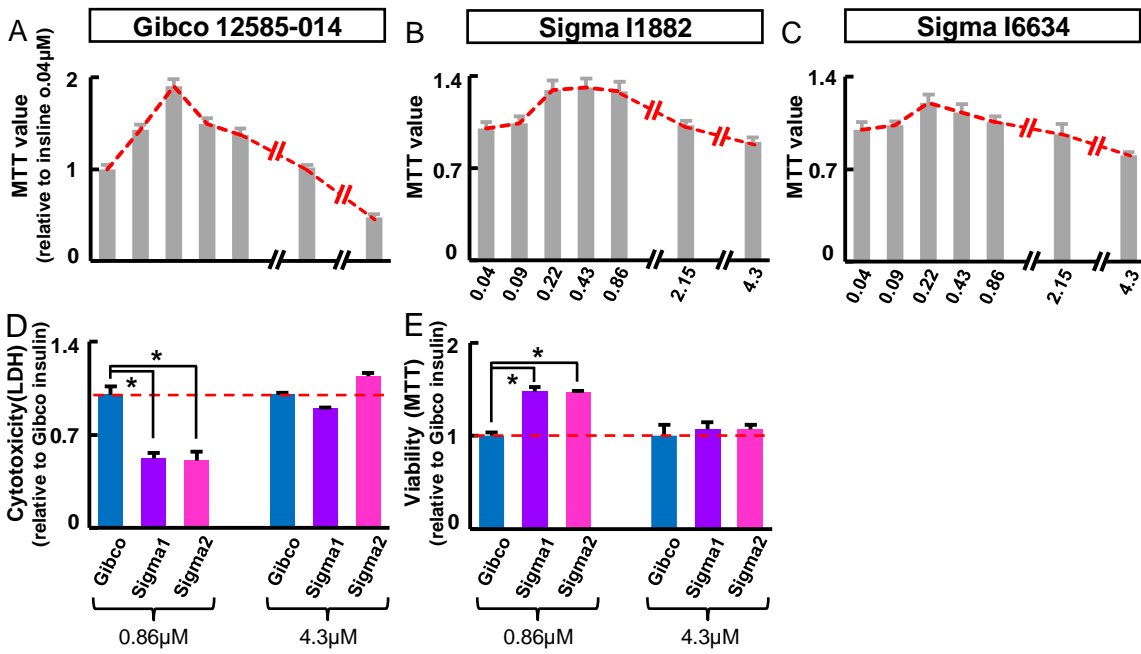

# Supplementary Figure S3

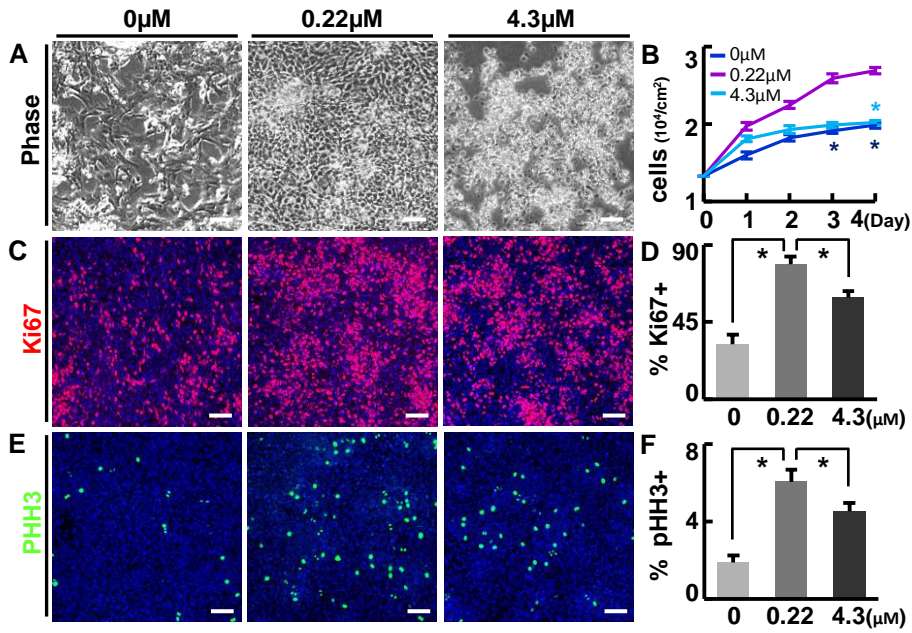

# Supplementary Figure S4

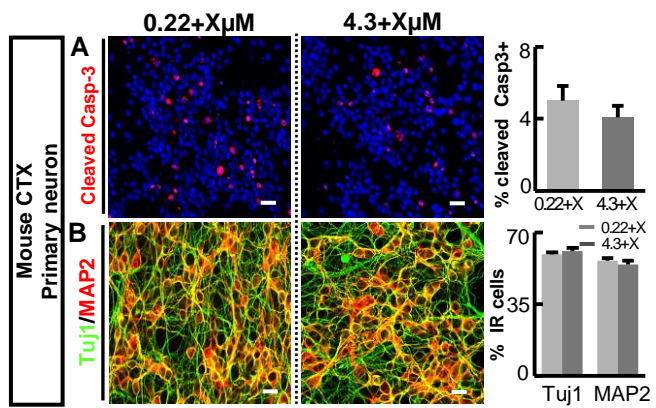

# Supplementary Figure S5

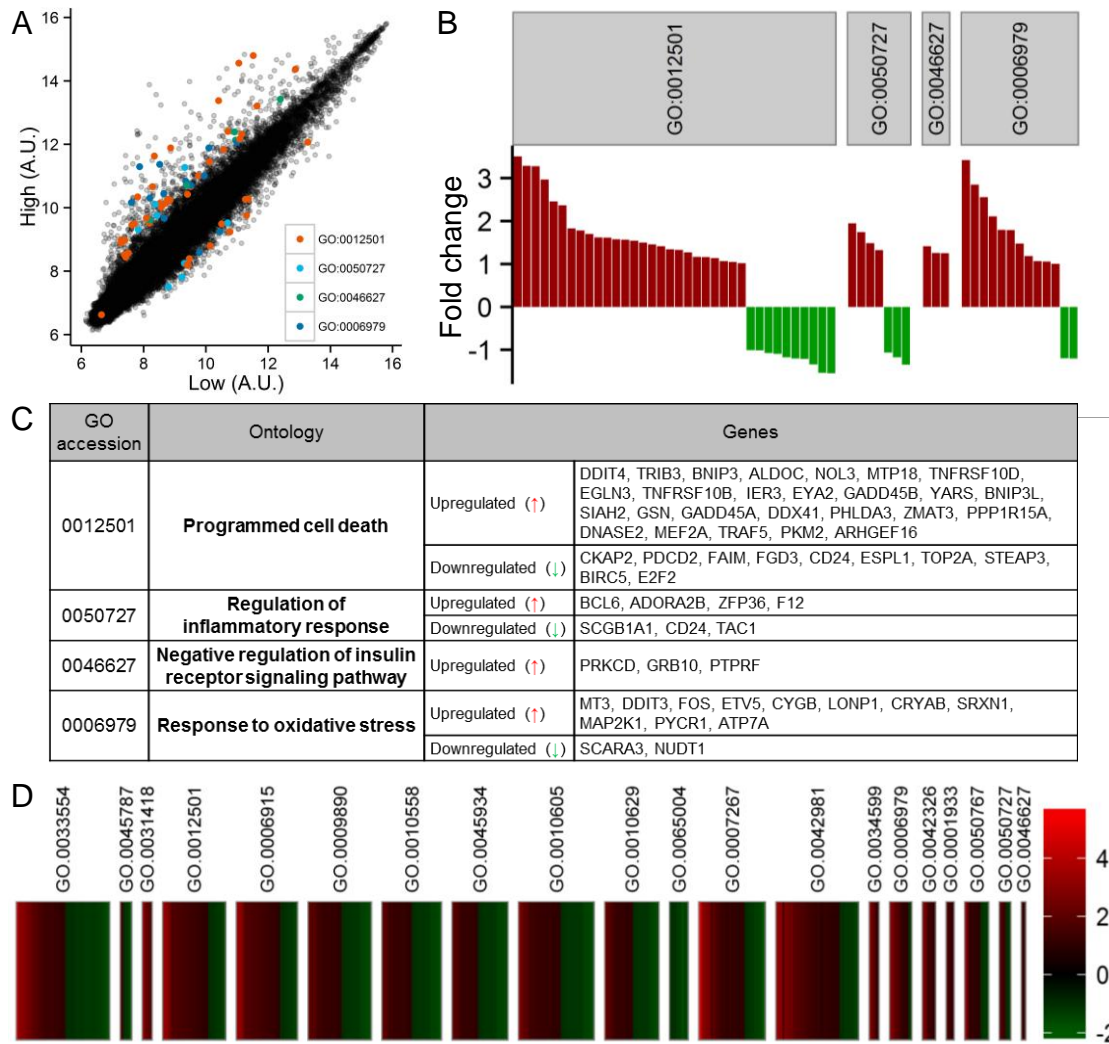

Supplement: cddis2013295x1.pdf [file cddis2013295x1.pdf]
